# Supplementary material for: Ground Truthing of Dumpsites using Remote Sensing and Machine Learning Approaches in Peri-Urban Settings
Source: Research Square preprint supplement (doi:10.21203/rs.3.rs-7140963/v1), 2025-11-03
Supplement: Supplementary file 1 [file 22ef3f36acca597c1ac9ff4d.docx]

**List of Supplementary Material**

**Fig. S1** Spatial distribution of NDVI and NDBI indices across Madhya Pradesh

**Fig. S2** Regression coefficients representing the directional influence of NDBI, NDVI, and LST on dumpsite classification

| **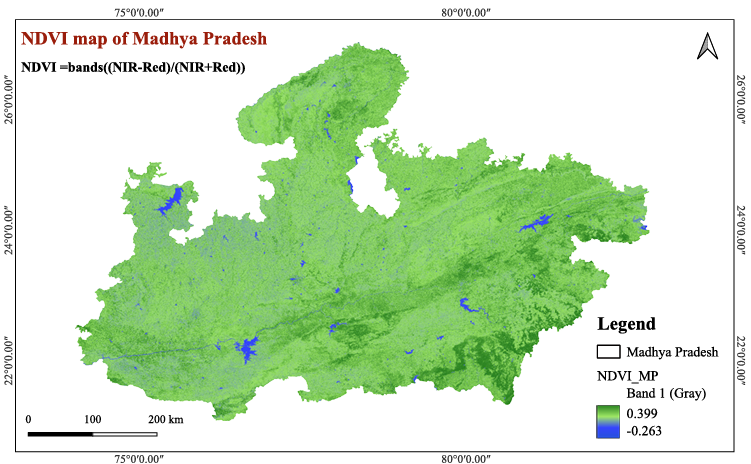** |
| --- |
| **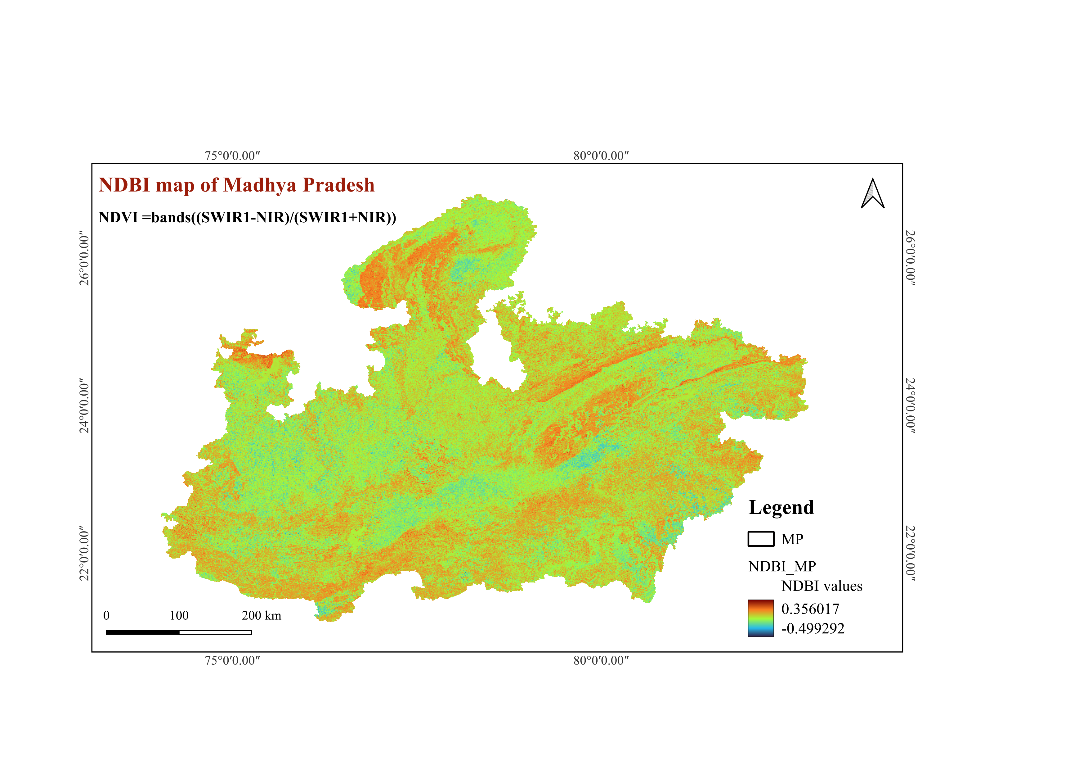** |
| **Fig. S1** Spatial distribution of NDVI and NDBI indices across Madhya Pradesh |


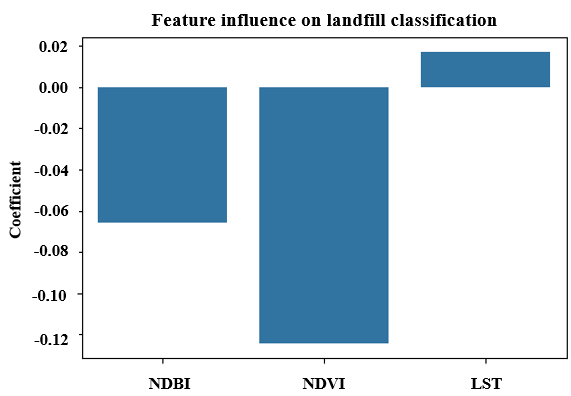


**Fig. S2** Regression coefficients representing the directional influence of NDBI, NDVI, and LST on dumpsite classification
